# Supplementary material
Source: Springer Nature journal article supplement (https://www.springermedizin.de/resource/supplementary/12888_2009_714_MOESM10_ESM.pdf/9478256)

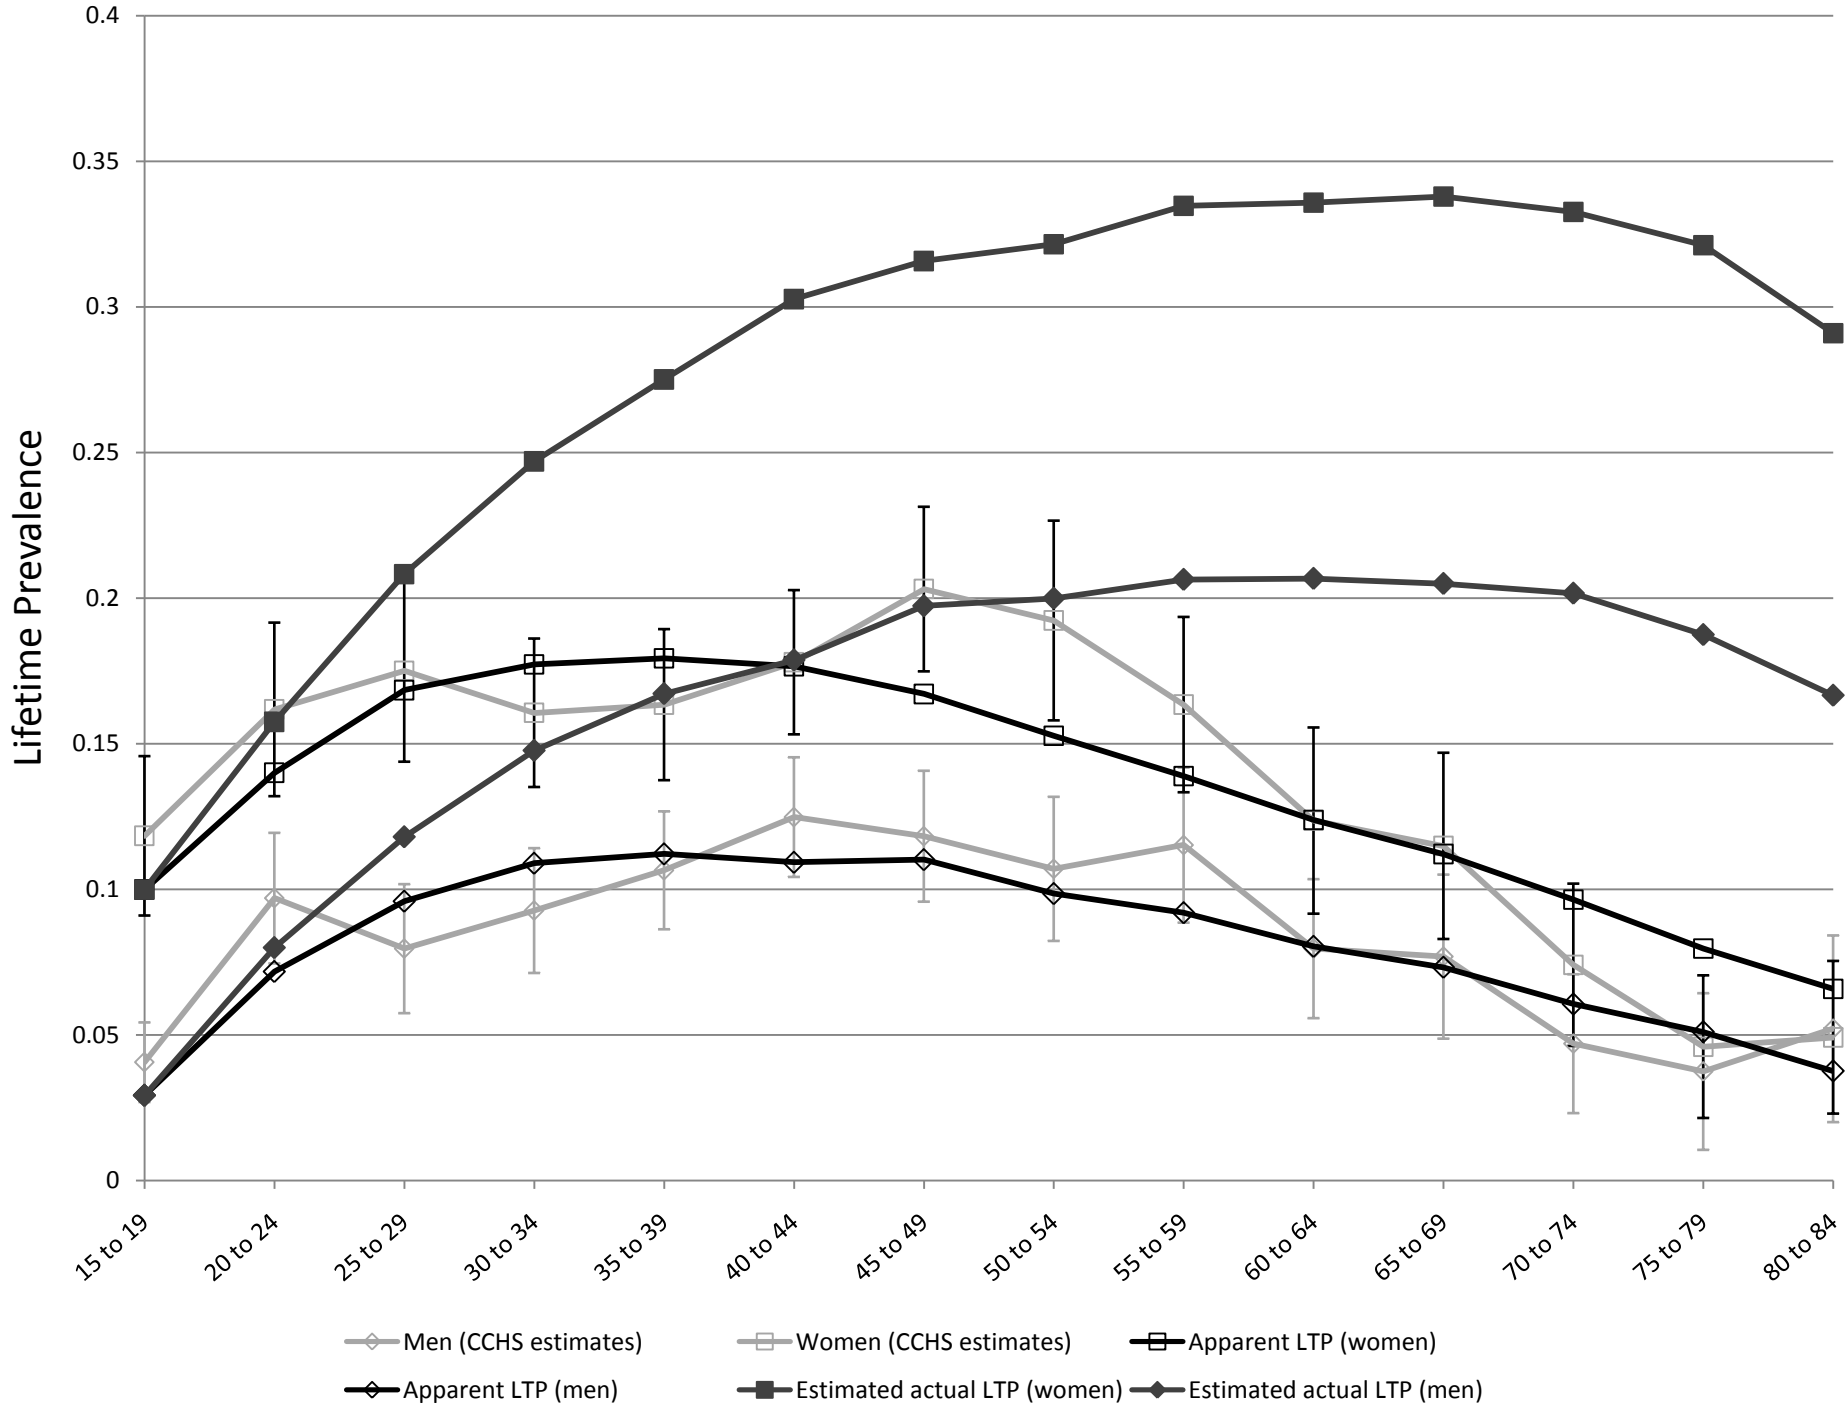

Supplement: MOESM10 [file 9478256]
